# Supplementary material for: Indirect impact of childhood 13-valent pneumococcal conjugate vaccine (PCV13) in Canadian older adults: a Canadian Immunization Research Network (CIRN) retrospective observational study
Source: PubMed Central journal article supplement — Thorax. 2024 Feb 15;79(9):861–9. doi: 10.1136/thorax-2023-220377 (PMC11347212; doi:10.1136/thorax-2023-220377), 2024-02-15
Supplement: thorax-2023-220377supp001.pdf [file thorax-2023-220377supp001.pdf]

## Supplementary materials

Supplementary Table S1: Diagnostic codes used to identify all-cause pneumonia, fracture, and skin and soft tissue infection in Ontario and British Columbia

| <b>Study Outcome and Diagnosis</b>                | <b>ICD-10 codes for hospitalization</b> |
|---------------------------------------------------|-----------------------------------------|
| <b>All-cause pneumonia</b>                        |                                         |
| Pneumococcal pneumonia                            | J13                                     |
| Bronchopneumonia and lobar pneumonia, unspecified | J18.0, J18.1                            |
| Other pneumonia                                   | J14, J15, J16, J17, J10.0, J11.0        |
| Viral pneumonia                                   | J12                                     |
| Empyema                                           | J86.9                                   |
| Abscess of lung with pneumonia                    | J85.1                                   |
| <b>Fracture</b>                                   |                                         |
| Fracture of skull and facial bones                | S02                                     |
| Fracture of neck                                  | S12                                     |
| Fracture of rib(s), sternum and thoracic spine    | S22                                     |
| Fracture of lumbar spine and pelvis               | S32                                     |
| Fracture of shoulder and upper arm                | S42                                     |
| Fracture of forearm                               | S52                                     |
| Fracture at wrist and hand level                  | S62                                     |
| Fracture of femur                                 | S72                                     |
| Fracture of lower leg, including ankle            | S82                                     |
| Fracture of foot, except ankle                    | S92                                     |
| <b>Skin and soft tissue infection</b>             |                                         |
| Staphylococcal scalded skin syndrome              | L00                                     |
| Impetigo                                          | L01                                     |
| Cutaneous abscess, furuncle and carbuncle         | L02                                     |
| Cellulitis                                        | L03                                     |
| Acute lymphadenitis                               | L04                                     |

Supplemental Table S2: Annual incidence of invasive pneumococcal disease (IPD) and hospitalized all-cause pneumonia, fracture, and skin and soft tissue infection (SSTI) in adults aged ≥65 years in Ontario and British Columbia, 2005–2018

| Year               | Incidence per 100,000 population (95% Confidence interval) |                         |                           |                         |                      |                         |                            |                         |
|--------------------|------------------------------------------------------------|-------------------------|---------------------------|-------------------------|----------------------|-------------------------|----------------------------|-------------------------|
|                    | Ontario                                                    |                         |                           |                         | British Columbia     |                         |                            |                         |
|                    | IPD                                                        | All-cause pneumonia     | Fracture                  | SSTI                    | IPD                  | All-cause pneumonia     | Fracture                   | SSTI                    |
| <b>≥65 years</b>   |                                                            |                         |                           |                         |                      |                         |                            |                         |
| 2005               | 20.9<br>(17.3, 25.2)                                       | 429.2<br>(357.0, 516.0) | 1121.3<br>(932.7, 1348.0) | 354.2<br>(311.1, 403.3) | 12.2 (8.5, 17.3)     | 367.6<br>(327.7, 412.3) | 1180.9<br>(1126.4, 1238.1) | 169.9<br>(156.7, 184.3) |
| 2006               | 25.8<br>(21.8, 30.5)                                       | 394.1<br>(325.9, 476.5) | 1078.9<br>(896.2, 1298.9) | 342.3<br>(300.4, 390.0) | 12.4 (8.7, 17.5)     | 362.4<br>(323.3, 406.2) | 1158.6<br>(1105.3, 1214.5) | 180.0<br>(166.5, 194.6) |
| 2007               | 22.8<br>(19.12, 27.2)                                      | 383.2<br>(316.7, 463.5) | 1053.0<br>(874.6, 1267.7) | 329.6<br>(289.0, 375.9) | 19.2<br>(14.6, 25.3) | 358.3<br>(319.9, 401.3) | 1004.1<br>(955.1, 1055.6)  | 155.7<br>(143.3, 169.1) |
| 2008               | 24.2<br>(20.5, 28.6)                                       | 386.5<br>(320.5, 466.0) | 1037.3<br>(862.5, 1247.6) | 340.0<br>(299.2, 386.3) | 18.9<br>(14.4, 24.8) | 378.3<br>(339.2, 421.8) | 967.5<br>(920.1, 1017.4)   | 168.8<br>(156.0, 182.6) |
| 2009               | 26.3<br>(22.4, 30.8)                                       | 390.8<br>(325.2, 469.5) | 991.3<br>(822.8, 1194.3)  | 342.5<br>(302.1, 388.3) | 16.2<br>(12.1, 21.6) | 335.4<br>(299.3, 375.9) | 922.8<br>(877.2, 970.9)    | 189.3<br>(175.9, 203.6) |
| 2010               | 27.6<br>(23.7, 32.2)                                       | 404.6<br>(338.7, 483.5) | 978.0<br>(812.8, 1176.7)  | 365.2<br>(323.9, 411.8) | 13.0 (9.5, 17.9)     | 333.7<br>(298.1, 373.5) | 934.8<br>(889.5, 982.4)    | 202.8<br>(189.4, 217.4) |
| 2011               | 26.4<br>(22.7, 30.8)                                       | 445.7<br>(377.2, 526.6) | 978.6<br>(815.8, 1174.0)  | 380.5<br>(338.9, 427.1) | 14.9<br>(11.1, 20.0) | 378.1<br>(340.7, 419.6) | 931.0<br>(886.5, 977.8)    | 209.3<br>(195.6, 223.9) |
| 2012               | 27.8<br>(24.0, 32.2)                                       | 439.3<br>(372.6, 518.1) | 973.8<br>(814.3, 1164.5)  | 385.1<br>(344.0, 431.0) | 18.0<br>(13.8, 23.3) | 391.5<br>(354.1, 432.8) | 914.2<br>(871.0, 959.6)    | 213.3<br>(199.8, 227.7) |
| 2013               | 23.1<br>(19.7, 27.1)                                       | 453.0<br>(386.3, 531.1) | 976.7<br>(819.8, 1163.7)  | 391.8<br>(351.1, 437.2) | 17.2<br>(13.3, 22.4) | 399.2<br>(362.2, 439.9) | 902.3<br>(860.2, 946.4)    | 228.6<br>(214.9, 243.2) |
| 2014               | 22.9<br>(19.6, 26.8)                                       | 529.5<br>(458.2, 612.0) | 957.6<br>(804.8, 1139.4)  | 391.2<br>(351.2, 435.7) | 18.6<br>(14.5, 23.8) | 395.6<br>(359.5, 435.3) | 917.4<br>(875.8, 960.9)    | 221.8<br>(208.5, 235.8) |
| 2015               | 22.4<br>(19.2, 26.2)                                       | 534.9<br>(464.3, 616.3) | 920.3<br>(772.9, 1095.8)  | 392.4<br>(352.9, 436.2) | 16.5<br>(12.8, 21.3) | 352.0<br>(318.7, 388.8) | 845.5<br>(806.4, 886.5)    | 225.6<br>(212.5, 239.5) |
| 2016               | 20.4<br>(17.4, 23.9)                                       | 539.6<br>(469.7, 619.9) | 912.6<br>(768.1, 1084.3)  | 393.4<br>(354.5, 436.5) | 18.8<br>(14.9, 23.8) | 301.1<br>(271.0, 334.6) | 811.7<br>(774.1, 851.1)    | 212.6<br>(200.2, 225.9) |
| 2017               | 22.4<br>(19.3, 26.0)                                       | 600.2<br>(527.4, 683.0) | 901.3<br>(760.1, 1068.9)  | 403.3<br>(364.5, 446.1) | 19.8<br>(15.8, 24.8) | 317.0<br>(286.6, 350.6) | 782.3<br>(746.1, 820.2)    | 194.0<br>(182.4, 206.5) |
| 2018               | 22.7<br>(19.6, 26.2)                                       | 638.0<br>(564.0, 721.7) | 876.9<br>(739.9, 1039.3)  | 401.6<br>(363.5, 443.6) | 17.9<br>(14.1, 22.5) | 275.4<br>(247.7, 306.2) | 656.3<br>(623.9, 690.5)    | 151.4<br>(141.3, 162.2) |
| <b>65-74 years</b> |                                                            |                         |                           |                         |                      |                         |                            |                         |

|                    |                            |                            |                               |                             |                         |                            |                               |                            |
|--------------------|----------------------------|----------------------------|-------------------------------|-----------------------------|-------------------------|----------------------------|-------------------------------|----------------------------|
| 2005               | 16.1<br>(12.3,<br>21.0)    | 240.1<br>(208.9,<br>276.1) | 484.6<br>(444.0,<br>528.9)    | 230.1<br>(209.1,<br>253.2)  | 9.2 (5.5,<br>15.2)      | 205.9<br>(181.8,<br>233.2) | 575.5<br>(537.2,<br>616.5)    | 115.7<br>(102.2,<br>130.9) |
| 2006               | 19.8<br>(15.6,<br>25.1)    | 228.3<br>(198.1,<br>263.1) | 465.6<br>(426.2,<br>508.8)    | 223.0<br>(202.5,<br>245.6)  | 11.5 (7.3,<br>18.0)     | 203.9<br>(180.2,<br>230.7) | 570.5<br>(532.8,<br>610.8)    | 117.1<br>(103.7,<br>132.2) |
| 2007               | 16.8<br>(13.0,<br>21.7)    | 220.5<br>(191.1,<br>254.3) | 464.6<br>(425.6,<br>507.2)    | 210.8<br>(191.1,<br>232.5)  | 18.0<br>(12.7,<br>25.6) | 213.3<br>(189.3,<br>240.3) | 500.5<br>(465.7,<br>537.9)    | 113.5<br>(100.5,<br>128.2) |
| 2008               | 17.3<br>(13.5,<br>22.1)    | 215.6<br>(187.0,<br>248.6) | 462.9<br>(424.5,<br>504.8)    | 211.2<br>(191.8,<br>232.6)  | 12.9 (8.6,<br>19.5)     | 220.7<br>(196.6,<br>247.7) | 469.3<br>(436.2,<br>504.9)    | 120.7<br>(107.5,<br>135.6) |
| 2009               | 20.0<br>(15.9,<br>25.1)    | 231.6<br>(202.2,<br>265.1) | 438.4<br>(401.6,<br>478.6)    | 220.8<br>(201.2,<br>242.3)  | 12.8 (8.5,<br>19.1)     | 205.0<br>(182.2,<br>230.5) | 443.9<br>(412.3,<br>477.9)    | 120.6<br>(107.6,<br>135.2) |
| 2010               | 21.4<br>(17.3,<br>26.6)    | 219.7<br>(191.7,<br>251.9) | 419.4<br>(384.0,<br>458.0)    | 226.8<br>(207.2,<br>248.2)  | 9.2 (5.8,<br>14.7)      | 200.8<br>(178.7,<br>225.6) | 423.4<br>(393.1,<br>456.0)    | 137.6<br>(123.9,<br>152.8) |
| 2011               | 18.9<br>(15.1,<br>23.7)    | 241.9<br>(212.9,<br>274.8) | 424.2<br>(389.2,<br>462.3)    | 231.3<br>(211.9,<br>252.5)  | 9.9 (6.4,<br>15.4)      | 220.6<br>(197.8,<br>246.0) | 448.9<br>(418.3,<br>481.8)    | 137.1<br>(123.7,<br>152.0) |
| 2012               | 19.8<br>(16.0,<br>24.5)    | 245.6<br>(217.1,<br>277.9) | 425.6<br>(391.5,<br>462.6)    | 236.5<br>(217.3,<br>257.3)  | 13.4 (9.3,<br>19.4)     | 231.4<br>(208.7,<br>256.6) | 447.2<br>(417.5,<br>479.0)    | 133.4<br>(120.6,<br>147.7) |
| 2013               | 17.8<br>(14.3,<br>22.2)    | 244.1<br>(216.3,<br>275.3) | 431.9<br>(398.4,<br>468.3)    | 241.1<br>(222.3,<br>261.6)  | 12.9 (9.0,<br>18.6)     | 231.8<br>(209.7,<br>256.3) | 446.5<br>(417.6,<br>477.3)    | 149.5<br>(136.2,<br>164.0) |
| 2014               | 16.4<br>(13.1,<br>20.5)    | 286.1<br>(256.6,<br>319.0) | 425.2<br>(392.6,<br>460.5)    | 248.4<br>(229.6,<br>268.6)  | 13.6 (9.6,<br>19.2)     | 225.8<br>(204.6,<br>249.3) | 446.0<br>(417.9,<br>476.0)    | 144.2<br>(131.5,<br>158.1) |
| 2015               | 15.7<br>(12.6,<br>19.7)    | 276.1<br>(247.6,<br>307.8) | 402.2<br>(371.1,<br>435.8)    | 260.2<br>(241.3,<br>280.5)  | 11.6 (8.0,<br>16.7)     | 194.9<br>(175.7,<br>216.1) | 414.7<br>(388.4,<br>443.0)    | 141.5<br>(129.2,<br>154.9) |
| 2016               | 15.9<br>(12.7,<br>19.8)    | 286.2<br>(257.7,<br>317.8) | 406.7<br>(376.0,<br>439.8)    | 258.2<br>(239.8,<br>278.02) | 18.0<br>(13.5,<br>23.9) | 183.5<br>(165.3,<br>203.6) | 406.5<br>(381.0,<br>433.7)    | 145.9<br>(133.7,<br>159.1) |
| 2017               | 17.6<br>(14.3,<br>21.6)    | 310.6<br>(281.4,<br>342.9) | 416.9<br>(386.4,<br>449.8)    | 262.5<br>(244.3,<br>282.1)  | 16.4<br>(12.3,<br>22.0) | 179.7<br>(162.1,<br>199.2) | 411.3<br>(386.2,<br>438.1)    | 132.8<br>(121.4,<br>145.2) |
| 2018               | 16.6<br>(13.5,<br>20.4)    | 334.8<br>(305.0,<br>367.6) | 394.0<br>(364.9,<br>425.4)    | 263.0<br>(245.0,<br>282.2)  | 16.5<br>(12.4,<br>22.0) | 168.4<br>(151.7,<br>186.9) | 333.0<br>(310.9,<br>356.6)    | 104.3<br>(94.5,<br>115.1)  |
| <b>75-84 years</b> |                            |                            |                               |                             |                         |                            |                               |                            |
| 2005               | 20.55<br>(15.8,<br>26.72)  | 532.7<br>(459.5,<br>617.5) | 1333.5<br>(1209.2,<br>1470.7) | 428.9<br>(401.4,<br>458.3)  | 11.1 (6.9,<br>18.0)     | 460.1<br>(412.1,<br>513.7) | 1306.4<br>(1231.3,<br>1386.0) | 207.8<br>(187.8,<br>230.0) |
| 2006               | 25.75<br>(20.41,<br>32.48) | 484.0<br>(415.1,<br>564.3) | 1259.7<br>(1140.1,<br>1391.9) | 407.3<br>(380.7,<br>435.7)  | 11.9 (7.5,<br>18.9)     | 427.2<br>(381.3,<br>478.5) | 1286.3<br>(1212.4,<br>1364.7) | 216.2<br>(195.9,<br>238.7) |
| 2007               | 22.89<br>(17.92,<br>29.24) | 466.6<br>(399.5,<br>544.9) | 1229.9<br>(1112.6,<br>1359.6) | 401.1<br>(374.9,<br>429.0)  | 15.1<br>(10.0,<br>22.7) | 432.9<br>(387.0,<br>484.3) | 1115.5<br>(1047.2,<br>1188.2) | 181.8<br>(163.4,<br>202.4) |
| 2008               | 26.41<br>(21.06,<br>33.13) | 484.4<br>(416.3,<br>563.6) | 1206.8<br>(1091.2,<br>1334.5) | 398.3<br>(372.4,<br>426.1)  | 20.0<br>(14.1,<br>28.5) | 462.7<br>(415.4,<br>515.5) | 1062.9<br>(996.6,<br>1133.6)  | 188.7<br>(170.0,<br>209.5) |

|                  |                            |                              |                               |                            |                         |                            |                               |                            |
|------------------|----------------------------|------------------------------|-------------------------------|----------------------------|-------------------------|----------------------------|-------------------------------|----------------------------|
| 2009             | 26.33<br>(21.01,<br>33)    | 461.5<br>(395.4,<br>538.6)   | 1149.6<br>(1037.5,<br>1273.9) | 403.0<br>(377.0,<br>430.7) | 15.7<br>(10.6,<br>23.4) | 402.4<br>(358.6,<br>451.5) | 1049.6<br>(984.0,<br>1119.5)  | 225.4<br>(204.9,<br>248.0) |
| 2010             | 25.84<br>(20.6,<br>32.41)  | 491.8<br>(423.8,<br>570.6)   | 1135.0<br>(1024.3,<br>1257.7) | 429.1<br>(402.5,<br>457.5) | 14.6 (9.7,<br>22.0)     | 404.8<br>(361.2,<br>453.8) | 1033.5<br>(968.8,<br>1102.4)  | 238.0<br>(217.0,<br>260.9) |
| 2011             | 29.15<br>(23.59,<br>36.03) | 534.8<br>(464.2,<br>616.2)   | 1137.8<br>(1027.7,<br>1259.7) | 451.6<br>(424.5,<br>480.6) | 17.0<br>(11.7,<br>24.8) | 446.0<br>(400.4,<br>496.8) | 1037.3<br>(973.0,<br>1105.7)  | 224.6<br>(204.4,<br>246.7) |
| 2012             | 31.4<br>(25.64,<br>38.45)  | 514.7<br>(446.0,<br>594.0)   | 1129.0<br>(1020.1,<br>1249.6) | 458.3<br>(431.1,<br>487.2) | 15.9<br>(10.8,<br>23.4) | 476.5<br>(429.7,<br>528.4) | 1020.5<br>(957.3,<br>1087.9)  | 258.5<br>(237.0,<br>282.0) |
| 2013             | 24.7<br>(19.7,<br>30.98)   | 543.9<br>(473.7,<br>624.5)   | 1133.8<br>(1025.5,<br>1253.5) | 459.9<br>(432.9,<br>488.6) | 17.8<br>(12.4,<br>25.5) | 503.2<br>(455.4,<br>556.0) | 1004.6<br>(942.4,<br>1070.9)  | 259.6<br>(238.2,<br>282.9) |
| 2014             | 23.18<br>(18.39,<br>29.22) | 628.9<br>(553.7,<br>714.3)   | 1116.1<br>(1009.6,<br>1233.7) | 455.7<br>(429.1,<br>484.0) | 20.4<br>(14.6,<br>28.5) | 478.7<br>(432.5,<br>529.7) | 1046.6<br>(983.7,<br>1113.5)  | 255.1<br>(234.1,<br>278.0) |
| 2015             | 26.51<br>(21.39,<br>32.86) | 640.3<br>(565.0,<br>725.6)   | 1064.8<br>(961.8,<br>1178.8)  | 439.8<br>(413.9,<br>467.4) | 22.0<br>(16.0,<br>30.3) | 430.0<br>(386.9,<br>478.0) | 927.4<br>(869.0,<br>989.8)    | 265.8<br>(244.5,<br>288.8) |
| 2016             | 20.87<br>(16.42,<br>26.51) | 643.4<br>(568.6,<br>728.0)   | 1040.1<br>(939.4,<br>1151.7)  | 442.2<br>(416.4,<br>469.5) | 18.6<br>(13.2,<br>26.2) | 371.2<br>(331.7,<br>415.3) | 917.6<br>(860.2,<br>978.8)    | 242.5<br>(222.5,<br>264.2) |
| 2017             | 23.12<br>(18.48,<br>28.94) | 704.3<br>(626.9,<br>791.3)   | 1032.6<br>(933.6,<br>1142.2)  | 458.8<br>(432.9,<br>486.2) | 21.6<br>(15.8,<br>29.4) | 385.2<br>(345.6,<br>429.3) | 871.4<br>(816.4,<br>930.1)    | 218.2<br>(199.6,<br>238.6) |
| 2018             | 24.01<br>(19.33,<br>29.81) | 737.5<br>(659.4,<br>824.8)   | 1006.7<br>(910.6,<br>1113.1)  | 448.3<br>(423.1,<br>475.0) | 18.1<br>(12.9,<br>25.2) | 326.7<br>(291.1,<br>366.7) | 740.0<br>(690.4,<br>793.1)    | 166.7<br>(150.9,<br>184.3) |
| <b>≥85 years</b> |                            |                              |                               |                            |                         |                            |                               |                            |
| 2005             | 45.03<br>(32.93,<br>61.58) | 1004.2<br>(819.3,<br>1230.9) | 3501.2<br>(3236.2,<br>3787.9) | 709.3<br>(662.2,<br>759.7) | 28.0<br>(16.3,<br>48.0) | 792.1<br>(669.4,<br>937.3) | 3410.5<br>(3215.5,<br>3617.4) | 292.5<br>(252.2,<br>339.3) |
| 2006             | 53.34<br>(40.43,<br>70.37) | 870.7<br>(705.3,<br>1074.9)  | 3310.8<br>(3062.3,<br>3579.5) | 684.5<br>(639.9,<br>732.3) | 17.1 (8.8,<br>33.4)     | 837.5<br>(714.5,<br>981.6) | 3232.7<br>(3048.4,<br>3428.0) | 339.7<br>(297.3,<br>388.2) |
| 2007             | 49.16<br>(37.16,<br>65.04) | 849.0<br>(690.4,<br>1044.1)  | 3104.3<br>(2870.8,<br>3356.3) | 638.6<br>(596.8,<br>683.3) | 35.0<br>(22.2,<br>55.1) | 742.8<br>(630.4,<br>875.3) | 2731.6<br>(2567.0,<br>2906.7) | 255.9<br>(220.3,<br>297.3) |
| 2008             | 47.46<br>(35.97,<br>62.61) | 838.5<br>(684.8,<br>1026.7)  | 3005.8<br>(2782.4,<br>3247.1) | 724.0<br>(680.6,<br>770.2) | 39.4<br>(25.9,<br>59.9) | 787.2<br>(673.5,<br>920.1) | 2699.7<br>(2539.6,<br>2870.0) | 308.2<br>(269.7,<br>352.2) |
| 2009             | 52.48<br>(40.61,<br>67.83) | 863.6<br>(711.1,<br>1048.7)  | 2869.0<br>(2656.4,<br>3098.5) | 686.7<br>(645.5,<br>730.5) | 30.9<br>(19.5,<br>49.1) | 684.5<br>(581.2,<br>806.3) | 2500.0<br>(2349.3,<br>2660.5) | 370.9<br>(329.2,<br>417.8) |
| 2010             | 57.44<br>(45.23,<br>72.96) | 935.1<br>(779.4,<br>1121.8)  | 2855.9<br>(2649.0,<br>3079.0) | 765.7<br>(723.2,<br>810.6) | 24.2<br>(14.5,<br>40.5) | 685.3<br>(583.7,<br>804.6) | 2711.4<br>(2557.1,<br>2875.1) | 374.6<br>(333.5,<br>420.8) |
| 2011             | 50.13<br>(39.03,<br>64.39) | 1050.8<br>(888.4,<br>1243.0) | 2834.4<br>(2632.6,<br>3051.6) | 808.2<br>(765.4,<br>853.3) | 29.9<br>(18.9,<br>47.1) | 842.1<br>(730.3,<br>971.1) | 2593.5<br>(2445.1,<br>2751.0) | 459.4<br>(414.4,<br>509.4) |
| 2012             | 51.76<br>(40.68,<br>65.86) | 1051.0<br>(891.8,<br>1238.5) | 2846.6<br>(2648.7,<br>3059.2) | 816.7<br>(774.3,<br>861.0) | 41.3<br>(28.3,<br>60.5) | 845.5<br>(735.1,<br>972.5) | 2571.6<br>(2426.0,<br>2726.0) | 433.1<br>(390.0,<br>480.9) |

|      |                            |                               |                               |                            |                         |                             |                               |                            |
|------|----------------------------|-------------------------------|-------------------------------|----------------------------|-------------------------|-----------------------------|-------------------------------|----------------------------|
| 2013 | 41.26<br>(31.67,<br>53.75) | 1104.5<br>(944.0,<br>1292.2)  | 2866.5<br>(2671.7,<br>3075.5) | 855.8<br>(813.6,<br>900.2) | 34.1<br>(22.6,<br>51.5) | 861.1<br>(751.2,<br>987.1)  | 2579.3<br>(2435.6,<br>2731.4) | 489.2<br>(443.9,<br>539.1) |
| 2014 | 49.81<br>(39.32,<br>63.1)  | 1317.4<br>(1143.9,<br>1517.3) | 2818.8<br>(2628.9,<br>3022.4) | 838.9<br>(797.8,<br>882.1) | 35.9<br>(24.2,<br>53.4) | 935.3<br>(822.1,<br>1064.1) | 2647.6<br>(2504.2,<br>2799.2) | 478.8<br>(434.8,<br>527.4) |
| 2015 | 41.28<br>(31.97,<br>53.3)  | 1383.9<br>(1208.5,<br>1584.8) | 2773.0<br>(2587.7,<br>2971.5) | 840.7<br>(800.3,<br>883.3) | 25.5<br>(16.0,<br>40.5) | 866.8<br>(759.5,<br>989.3)  | 2557.0<br>(2418.1,<br>2703.9) | 505.2<br>(460.4,<br>554.2) |
| 2016 | 38.35<br>(29.57,<br>49.73) | 1371.9<br>(1200.5,<br>1567.7) | 2754.7<br>(2573.6,<br>2948.5) | 852.2<br>(812.3,<br>894.2) | 22.9<br>(14.2,<br>37.1) | 670.3<br>(578.0,<br>777.3)  | 2390.4<br>(2258.1,<br>2530.5) | 444.7<br>(403.5,<br>490.2) |
| 2017 | 40.9<br>(31.94,<br>52.38)  | 1590.5<br>(1408.0,<br>1796.6) | 2654.9<br>(2480.1,<br>2842.0) | 873.7<br>(833.9,<br>915.4) | 31.3<br>(20.8,<br>47.0) | 788.5<br>(689.1,<br>902.3)  | 2273.6<br>(2146.4,<br>2408.5) | 418.8<br>(379.4,<br>462.4) |
| 2018 | 45.35<br>(35.97,<br>57.17) | 1705.2<br>(1518.4,<br>1915.0) | 2641.7<br>(2469.7,<br>2825.6) | 886.8<br>(847.2,<br>928.2) | 23.5<br>(14.8,<br>37.3) | 652.0<br>(563.3,<br>754.6)  | 1959.3<br>(1842.9,<br>2083.0) | 333.8<br>(299.2,<br>372.4) |

Supplemental Table S3: Annual incidence of pneumococcal conjugate vaccine (PCV) serotype-specific invasive pneumococcal disease in adults aged  $\geq 65$  years in Ontario and British Columbia, 2005–2018.

| Year                              | Incidence per 100,000 population (95% Confidence interval) |                    |                   |                       |                      |                   |                      |                      |
|-----------------------------------|------------------------------------------------------------|--------------------|-------------------|-----------------------|----------------------|-------------------|----------------------|----------------------|
|                                   | Ontario                                                    |                    |                   |                       | British Columbia     |                   |                      |                      |
|                                   | PCV7                                                       | Additional PCV13   | Unique PPV23      | Non-vaccine serotype  | PCV7                 | Additional PCV13  | Unique PPV23         | Non-vaccine serotype |
| <b><math>\geq 65</math> years</b> |                                                            |                    |                   |                       |                      |                   |                      |                      |
| 2005                              | -                                                          | -                  | -                 | -                     | 5.82<br>(3.90, 8.68) | 3.25 (1.85, 5.73) | 2.40<br>(1.25, 4.60) | 0.68<br>(0.23, 2.00) |
| 2006                              | -                                                          | -                  | -                 | -                     | 3.50<br>(2.11, 5.83) | 3.34 (1.92, 5.80) | 3.17<br>(1.81, 5.55) | 1.67<br>(0.85, 3.29) |
| 2007                              | 2.96<br>(2.25, 3.89)                                       | 3.84 (2.81, 5.26)  | 2.19 (1.47, 3.26) | 2.37<br>(1.57, 3.56)  | 3.91<br>(2.43, 6.29) | 5.70 (3.75, 8.65) | 5.05<br>(3.26, 7.83) | 3.09<br>(1.89, 5.06) |
| 2008                              | 2.94<br>(2.24, 3.86)                                       | 5.99 (4.68, 7.67)  | 2.71 (1.90, 3.86) | 3.05<br>(2.14, 4.35)  | 3.65<br>(2.24, 5.93) | 5.39 (3.53, 8.24) | 6.34<br>(4.31, 9.33) | 3.33<br>(2.09, 5.32) |
| 2009                              | 2.58<br>(1.94, 3.44)                                       | 7.68 (6.19, 9.53)  | 4.32 (3.28, 5.69) | 3.42<br>(2.46, 4.76)  | 2.00<br>(1.05, 3.82) | 6.78 (4.67, 9.84) | 4.47<br>(2.84, 7.03) | 2.77<br>(1.67, 4.60) |
| 2010                              | 2.13<br>(1.56, 2.90)                                       | 9.76 (8.08, 11.79) | 5.29 (4.14, 6.77) | 5.02<br>(3.83, 6.57)  | 1.20<br>(0.53, 2.73) | 5.84 (3.93, 8.67) | 3.29<br>(1.96, 5.55) | 2.10<br>(1.18, 3.72) |
| 2011                              | 1.06<br>(0.68, 1.63)                                       | 8.62 (7.07, 10.50) | 4.70 (3.64, 6.08) | 7.03<br>(5.62, 8.80)  | 0.87<br>(0.34, 2.25) | 4.50 (2.89, 7.00) | 4.50<br>(2.90, 6.97) | 5.08<br>(3.53, 7.29) |
| 2012                              | 1.17<br>(0.78, 1.75)                                       | 7.97 (6.52, 9.75)  | 6.09 (4.88, 7.60) | 6.20<br>(4.90, 7.83)  | 1.25<br>(0.58, 2.72) | 5.43 (3.66, 8.06) | 5.57<br>(3.78, 8.19) | 5.57<br>(3.97, 7.81) |
| 2013                              | 0.93<br>(0.59, 1.45)                                       | 5.62 (4.44, 7.11)  | 6.30 (5.09, 7.80) | 6.06<br>(4.80, 7.64)  | 0.67<br>(0.24, 1.89) | 5.47 (3.72, 8.05) | 5.60<br>(3.85, 8.17) | 5.34<br>(3.80, 7.49) |
| 2014                              | 0.80<br>(0.50, 1.29)                                       | 4.72 (3.66, 6.07)  | 6.32 (5.13, 7.79) | 7.12<br>(5.77, 8.79)  | 0.64<br>(0.23, 1.82) | 4.61 (3.06, 6.96) | 6.92<br>(4.96, 9.64) | 6.41<br>(4.73, 8.67) |
| 2015                              | 1.10<br>(0.74, 1.63)                                       | 4.61 (3.59, 5.93)  | 7.04 (5.79, 8.55) | 7.04<br>(5.71, 8.66)  | 0.98<br>(0.43, 2.24) | 3.94 (2.54, 6.09) | 5.04<br>(3.44, 7.39) | 6.52<br>(4.86, 8.75) |
| 2016                              | 1.02<br>(0.68, 1.53)                                       | 4.20 (3.24, 5.44)  | 5.97 (4.84, 7.35) | 6.45<br>(5.21, 7.99)  | 1.77<br>(0.97, 3.24) | 3.19 (1.99, 5.14) | 7.10<br>(5.18, 9.73) | 6.50<br>(4.87, 8.68) |
| 2017                              | 1.15<br>(0.79, 1.68)                                       | 3.67 (2.80, 4.82)  | 7.13 (5.91, 8.60) | 8.46<br>(7.04, 10.16) | 2.16<br>(1.27, 3.69) | 3.98 (2.62, 6.05) | 7.17<br>(5.27, 9.75) | 6.37<br>(4.79, 8.49) |
| 2018                              | 1.32<br>(0.94, 1.86)                                       | 3.71 (2.85, 4.85)  | 7.51 (6.27, 8.99) | 7.67<br>(6.35, 9.28)  | 2.30<br>(1.38, 3.82) | 4.38 (2.97, 6.47) | 6.68<br>(4.89, 9.13) | 4.49<br>(3.21, 6.28) |
| <b>65-74 years</b>                |                                                            |                    |                   |                       |                      |                   |                      |                      |

|                    |                         |                       |                      |                         |                          |                       |                          |                         |
|--------------------|-------------------------|-----------------------|----------------------|-------------------------|--------------------------|-----------------------|--------------------------|-------------------------|
| 2005               | -                       | -                     | -                    | -                       | 3.92<br>(2.13,<br>7.22)  | 1.96 (0.78,<br>4.91)  | 2.94<br>(1.35, 6.4)      | 0.33<br>(0.04,<br>2.43) |
| 2006               | -                       | -                     | -                    | -                       | 3.19<br>(1.64,<br>6.22)  | 2.23 (0.95,<br>5.23)  | 3.51<br>(1.74,<br>7.09)  | 2.23<br>(1.05,<br>4.77) |
| 2007               | 2.47<br>(1.64,<br>3.74) | 2.70 (1.59,<br>4.59)  | 1.35 (0.68,<br>2.69) | 1.57<br>(0.82,<br>3.01) | 3.11<br>(1.59,<br>6.06)  | 6.22 (3.76,<br>10.28) | 4.66<br>(2.55,<br>8.51)  | 2.49<br>(1.22,<br>5.05) |
| 2008               | 2.08<br>(1.33,<br>3.23) | 4.48 (2.98,<br>6.72)  | 1.75 (0.96,<br>3.17) | 1.75<br>(0.95,<br>3.21) | 3.01<br>(1.54,<br>5.87)  | 4.82 (2.74,<br>8.45)  | 3.01<br>(1.44,<br>6.29)  | 2.11<br>(0.99,<br>4.50) |
| 2009               | 2.75<br>(1.88,<br>4.02) | 5.82 (4.10,<br>8.26)  | 2.96 (1.89,<br>4.65) | 2.54<br>(1.55,<br>4.17) | 2.03<br>(0.91,<br>4.51)  | 5.80 (3.51,<br>9.59)  | 3.77<br>(1.97,<br>7.19)  | 1.16<br>(0.43,<br>3.16) |
| 2010               | 1.43<br>(0.86,<br>2.40) | 8.71 (6.57,<br>11.55) | 5.02 (3.57,<br>7.06) | 3.07<br>(1.97,<br>4.79) | 1.12<br>(0.39,<br>3.22)  | 4.19 (2.35,<br>7.50)  | 2.52<br>(1.16,<br>5.47)  | 1.12<br>(0.41,<br>3.05) |
| 2011               | 0.39<br>(0.15,<br>1.04) | 6.80 (4.97,<br>9.30)  | 3.55 (2.38,<br>5.28) | 4.63<br>(3.25,<br>6.60) | 1.34<br>(0.52,<br>3.45)  | 2.68 (1.32,<br>5.47)  | 4.02 (2.2,<br>7.35)      | 1.88<br>(0.88,<br>4.01) |
| 2012               | 0.84<br>(0.44,<br>1.60) | 5.97 (4.32,<br>8.27)  | 5.04 (3.64,<br>6.97) | 4.20<br>(2.93,<br>6.03) | 0.51<br>(0.11,<br>2.26)  | 4.81 (2.87,<br>8.06)  | 3.80<br>(2.08,<br>6.93)  | 4.3 (2.65,<br>7.00)     |
| 2013               | 0.53<br>(0.24,<br>1.17) | 4.52 (3.14,<br>6.50)  | 4.87 (3.53,<br>6.72) | 4.96<br>(3.59,<br>6.86) | 0.24<br>(0.03,<br>1.97)  | 4.77 (2.89,<br>7.90)  | 4.06<br>(2.31,<br>7.14)  | 3.58<br>(2.13,<br>6.01) |
| 2014               | 0.51<br>(0.23,<br>1.12) | 3.39 (2.25,<br>5.12)  | 4.92 (3.60,<br>6.73) | 4.16<br>(2.94,<br>5.88) | 0.68<br>(0.20,<br>2.30)  | 3.84 (2.23,<br>6.63)  | 3.84<br>(2.18,<br>6.76)  | 5.20<br>(3.42,<br>7.90) |
| 2015               | 0.73<br>(0.39,<br>1.40) | 3.59 (2.42,<br>5.31)  | 4.81 (3.53,<br>6.56) | 4.65<br>(3.37,<br>6.41) | 0.43<br>(0.10,<br>1.91)  | 2.79 (1.49,<br>5.20)  | 4.72<br>(2.87,<br>7.75)  | 3.64<br>(2.24,<br>5.93) |
| 2016               | 0.86<br>(0.48,<br>1.55) | 2.98 (1.96,<br>4.55)  | 4.63 (3.39,<br>6.32) | 4.94<br>(3.64,<br>6.71) | 2.25<br>(1.19,<br>4.25)  | 3.88 (2.32,<br>6.50)  | 6.95<br>(4.66,<br>10.36) | 4.70<br>(3.09,<br>7.14) |
| 2017               | 0.98<br>(0.57,<br>1.68) | 3.17 (2.12,<br>4.74)  | 5.82 (4.43,<br>7.63) | 6.04<br>(4.61,<br>7.93) | 2.15<br>(1.14,<br>4.07)  | 2.54 (1.36,<br>4.74)  | 6.65<br>(4.46,<br>9.91)  | 4.89<br>(3.27,<br>7.30) |
| 2018               | 1.53<br>(1.00,<br>2.33) | 3.06 (2.05,<br>4.57)  | 5.32 (4.02,<br>7.03) | 5.17<br>(3.88,<br>6.90) | 2.44<br>(1.36,<br>4.39)  | 4.70 (2.99,<br>7.37)  | 6.01<br>(3.98,<br>9.08)  | 3.38<br>(2.11,<br>5.43) |
| <b>75-84 years</b> |                         |                       |                      |                         |                          |                       |                          |                         |
| 2005               | -                       | -                     | -                    | -                       | 6.77<br>(4.15,<br>11.04) | 2.90 (1.18,<br>7.13)  | 0.97<br>(0.23,<br>4.11)  | 0.48<br>(0.06,<br>4.11) |
| 2006               | -                       | -                     | -                    | -                       | 3.33<br>(1.67,<br>6.66)  | 5.24 (2.69,<br>10.18) | 2.86<br>(1.24,<br>6.59)  | 0.48<br>(0.06,<br>4.05) |
| 2007               | 2.17<br>(1.29,<br>3.65) | 3.51 (2.09,<br>5.90)  | 2.34 (1.27,<br>4.30) | 2.84<br>(1.63,<br>4.94) | 3.77<br>(1.97,<br>7.20)  | 4.71 (2.35,<br>9.46)  | 3.30<br>(1.52,<br>7.14)  | 2.83<br>(1.18,<br>6.77) |
| 2008               | 3.14<br>(2.04,<br>4.82) | 5.45 (3.60,<br>8.24)  | 3.47 (2.11,<br>5.70) | 4.29<br>(2.74,<br>6.72) | 3.26<br>(1.63,<br>6.52)  | 3.26 (1.42,<br>7.51)  | 8.39<br>(5.18,<br>13.58) | 4.66<br>(2.37,<br>9.17) |

|                  |                          |                            |                           |                            |                           |                           |                           |                           |
|------------------|--------------------------|----------------------------|---------------------------|----------------------------|---------------------------|---------------------------|---------------------------|---------------------------|
| 2009             | 1.31<br>(0.68,<br>2.53)  | 8.18 (5.84,<br>11.45)      | 4.58 (2.98,<br>7.04)      | 3.92<br>(2.46,<br>6.26)    | 1.39<br>(0.48,<br>3.99)   | 6.01 (3.26,<br>11.07)     | 5.54<br>(3.07,<br>10.01)  | 2.77<br>(1.16,<br>6.64)   |
| 2010             | 1.13<br>(0.56,<br>2.29)  | 9.21 (6.72,<br>12.62)      | 4.36 (2.81,<br>6.76)      | 5.98<br>(4.10,<br>8.70)    | 1.82<br>(0.73,<br>4.55)   | 6.84 (3.87,<br>12.08)     | 2.74<br>(1.19,<br>6.31)   | 1.82<br>(0.63,<br>5.32)   |
| 2011             | 1.27<br>(0.66,<br>2.47)  | 10.04 (7.44,<br>13.55)     | 4.62 (3.03,<br>7.05)      | 7.81<br>(5.63,<br>10.82)   | 0.45<br>(0.07,<br>2.80)   | 5.83 (3.16,<br>10.74)     | 4.48<br>(2.35,<br>8.56)   | 6.28<br>(3.54,<br>11.12)  |
| 2012             | 1.10<br>(0.54,<br>2.23)  | 8.64 (6.26,<br>11.90)      | 5.97 (4.12,<br>8.64)      | 6.91<br>(4.90,<br>9.75)    | 1.76<br>(0.71,<br>4.41)   | 4.41 (2.20,<br>8.86)      | 5.29<br>(2.93,<br>9.56)   | 4.41<br>(2.24,<br>8.68)   |
| 2013             | 1.54<br>(0.86,<br>2.79)  | 5.25 (3.49,<br>7.90)       | 6.95 (4.95,<br>9.76)      | 6.18<br>(4.30,<br>8.86)    | 0.87<br>(0.24,<br>3.16)   | 5.20 (2.75,<br>9.83)      | 6.50<br>(3.83,<br>11.02)  | 5.20<br>(2.80,<br>9.65)   |
| 2014             | 1.36<br>(0.73,<br>2.54)  | 4.54 (2.94,<br>7.02)       | 6.21 (4.35,<br>8.87)      | 8.33<br>(6.12,<br>11.34)   | 0.00                      | 4.25 (2.12,<br>8.54)      | 11.48<br>(7.74,<br>17.01) | 4.68<br>(2.45,<br>8.92)   |
| 2015             | 1.04<br>(0.51,<br>2.11)  | 5.81 (3.97,<br>8.50)       | 8.04 (5.90,<br>10.97)     | 8.19<br>(6.02,<br>11.15)   | 1.25<br>(0.43,<br>3.59)   | 4.57 (2.35,<br>8.89)      | 5.82<br>(3.37,<br>10.06)  | 10.40<br>(6.78,<br>15.95) |
| 2016             | 1.02<br>(0.50,<br>2.07)  | 5.11 (3.42,<br>7.64)       | 6.86 (4.92,<br>9.56)      | 6.27<br>(4.43,<br>8.89)    | 1.21<br>(0.42,<br>3.49)   | 3.24 (1.48,<br>7.06)      | 6.48<br>(3.88,<br>10.80)  | 7.69<br>(4.71,<br>12.57)  |
| 2017             | 0.99<br>(0.49,<br>2.01)  | 3.40 (2.09,<br>5.53)       | 7.23 (5.26,<br>9.96)      | 9.50<br>(7.19,<br>12.57)   | 2.74<br>(1.37,<br>5.48)   | 4.70 (2.49,<br>8.89)      | 8.23<br>(5.27,<br>12.86)  | 5.88<br>(3.38,<br>10.21)  |
| 2018             | 1.37<br>(0.76,<br>2.48)  | 3.70 (2.34,<br>5.86)       | 8.09 (6.01,<br>10.89)     | 7.41<br>(5.43,<br>10.11)   | 2.26<br>(1.07,<br>4.77)   | 4.14 (2.13,<br>8.05)      | 7.90<br>(5.06,<br>12.35)  | 3.76<br>(1.91,<br>7.41)   |
| <b>≥85 years</b> |                          |                            |                           |                            |                           |                           |                           |                           |
| 2005             | -                        | -                          | -                         | -                          | 11.20<br>(6.46,<br>19.40) | 9.80 (4.45,<br>21.57)     | 4.20<br>(1.25,<br>14.16)  | 2.80<br>(0.66,<br>11.88)  |
| 2006             | -                        | -                          | -                         | -                          | 5.27<br>(2.42,<br>11.46)  | 2.63 (0.60,<br>11.53)     | 2.63<br>(0.59,<br>11.67)  | 2.63<br>(0.62,<br>11.18)  |
| 2007             | 7.37<br>(4.68,<br>11.63) | 9.83 (5.93,<br>16.31)      | 5.41 (2.78,<br>10.53)     | 4.42<br>(2.00,<br>9.77)    | 7.49<br>(3.97,<br>14.13)  | 6.24 (2.45,<br>15.88)     | 11.24<br>(5.57,<br>22.66) | 6.24<br>(2.50,<br>15.58)  |
| 2008             | 6.05<br>(3.71,<br>9.87)  | 13.96 (9.23,<br>21.11)     | 4.65 (2.31,<br>9.36)      | 5.12<br>(2.50,<br>10.48)   | 7.17<br>(3.80,<br>13.52)  | 13.14<br>(7.00,<br>24.67) | 14.33<br>(7.81,<br>26.32) | 4.78<br>(1.72,<br>13.28)  |
| 2009             | 5.29<br>(3.18,<br>8.81)  | 14.11 (9.46,<br>21.06)     | 9.26 (5.72,<br>15.00)     | 5.73<br>(2.97,<br>11.09)   | 3.43<br>(1.40,<br>8.43)   | 12.59<br>(6.71,<br>23.64) | 4.58<br>(1.60,<br>13.12)  | 9.16<br>(4.44,<br>18.87)  |
| 2010             | 7.55<br>(4.98,<br>11.44) | 15.51<br>(10.69,<br>22.51) | 8.81 (5.44,<br>14.26)     | 10.48<br>(6.52,<br>16.86)  | 0.00                      | 9.92 (4.94,<br>19.89)     | 7.71<br>(3.48,<br>17.09)  | 6.61<br>(2.87,<br>15.23)  |
| 2011             | 3.21<br>(1.72,<br>5.99)  | 12.43 (8.28,<br>18.67)     | 9.63 (6.13,<br>15.11)     | 14.84<br>(10.04,<br>21.94) | 0.00 0                    | 8.53 (4.08,<br>17.85)     | 6.40<br>(2.71,<br>15.11)  | 14.92<br>(8.64,<br>25.78) |
| 2012             | 2.68<br>(1.38,<br>5.23)  | 14.57<br>(10.09,<br>21.04) | 10.74<br>(7.07,<br>16.30) | 12.65<br>(8.36,<br>19.14)  | 3.10<br>(1.26,<br>7.61)   | 10.34<br>(5.34,<br>20.01) | 13.44<br>(7.49,<br>24.09) | 13.44<br>(7.62,<br>23.69) |



|      |                         |                        |                            |                            |                         |                       |                           |                           |
|------|-------------------------|------------------------|----------------------------|----------------------------|-------------------------|-----------------------|---------------------------|---------------------------|
| 2013 | 1.11<br>(0.40,<br>3.06) | 11.05 (7.31,<br>16.71) | 10.68<br>(7.09,<br>16.10)  | 10.32<br>(6.58,<br>16.17)  | 2.00<br>(0.67,<br>6.02) | 9.02 (4.50,<br>18.10) | 10.02<br>(5.15,<br>19.51) | 13.03<br>(7.39,<br>22.98) |
| 2014 | 0.71<br>(0.20,<br>2.48) | 10.67 (7.06,<br>16.14) | 12.45<br>(8.57,<br>18.09)  | 16.72<br>(11.82,<br>23.65) | 1.94<br>(0.65,<br>5.83) | 8.74 (4.36,<br>17.54) | 9.71<br>(4.99,<br>18.9)   | 15.54<br>(9.32,<br>25.91) |
| 2015 | 2.75<br>(1.47,<br>5.14) | 6.19 (3.63,<br>10.56)  | 14.10<br>(9.99,<br>19.91)  | 14.45<br>(10.01,<br>20.85) | 2.83<br>(1.15,<br>6.95) | 7.55 (3.61,<br>15.81) | 4.72<br>(1.84,<br>12.1)   | 10.39<br>(5.61,<br>19.24) |
| 2016 | 1.65<br>(0.75,<br>3.64) | 7.27 (4.49,<br>11.79)  | 9.59 (6.36,<br>14.45)      | 13.22<br>(9.08,<br>19.26)  | 0.92<br>(0.19,<br>4.34) | 0.00                  | 9.17<br>(4.71,<br>17.84)  | 11.92<br>(6.76,<br>21.02) |
| 2017 | 2.24<br>(1.15,<br>4.36) | 6.39 (3.85,<br>10.60)  | 12.46<br>(8.75,<br>17.75)  | 16.30<br>(11.68,<br>22.74) | 0.89<br>(0.19,<br>4.23) | 8.93 (4.61,<br>17.29) | 7.14<br>(3.39,<br>15.04)  | 14.29<br>(8.57,<br>23.82) |
| 2018 | 0.31<br>(0.05,<br>1.81) | 6.52 (3.98,<br>10.69)  | 15.53<br>(11.36,<br>21.22) | 18.95<br>(13.97,<br>25.69) | 1.74<br>(0.58,<br>5.22) | 3.48 (1.22,<br>9.88)  | 6.95 (3.3,<br>14.64)      | 11.30<br>(6.41,<br>19.93) |

Supplemental Table S4: Indirect impact of PCV13 on invasive pneumococcal disease and hospitalized pneumonia in older adults by age group in Ontario, 2005–2018\*

| Age group, years            | Fracture control       |                           |                               |         | Skin and soft tissue infection control |                           |                               |         |
|-----------------------------|------------------------|---------------------------|-------------------------------|---------|----------------------------------------|---------------------------|-------------------------------|---------|
|                             | Incidence per 100,000  |                           | Ratio of risk ratios (95% CI) | P-value | Incidence per 100,000                  |                           | Ratio of risk ratios (95% CI) | P-value |
|                             | Case, pre-PCV13, PCV13 | Control, pre-PCV13, PCV13 |                               |         | Case, pre-PCV13, PCV13                 | Control, pre-PCV13, PCV13 |                               |         |
| <b>All IPD</b>              |                        |                           |                               |         |                                        |                           |                               |         |
| 65-74                       | 15.1, 15.4             | 45.0, 46.2                | 0.99 (0.79, 1.26)             | 0.9651  | 15.0, 15.0                             | 44.4, 45.1                | 0.99 (0.79, 1.23)             | 0.8959  |
| 75-84                       | 22.1, 24.7             | 66.4, 74.0                | 1.00 (0.79, 1.26)             | 1.0000  | 22.0, 24.3                             | 65.2, 72.9                | 0.99 (0.80, 1.22)             | 0.8914  |
| ≥85                         | 45.3, 44.5             | 135.5, 133.5              | 1.00 (0.77, 1.30)             | 0.9857  | 44.6, 42.8                             | 130.9, 128.5              | 0.98 (0.77, 1.24)             | 0.8640  |
| <b>PCV7 IPD</b>             |                        |                           |                               |         |                                        |                           |                               |         |
| 65-74                       | 2.3, 0.4               | 6.8, 1.3                  | 1.00 (0.59, 1.71)             | 1.0000  | 2.2, 0.4                               | 6.4, 1.2                  | 0.95 (0.56, 1.62)             | 0.8615  |
| 75-84                       | 2.0, 1.2               | 6.1, 3.5                  | 1.00 (0.51, 1.97)             | 1.0000  | 2.0, 1.2                               | 6.0, 3.5                  | 0.98 (0.52, 1.82)             | 0.9367  |
| ≥85                         | 6.0, 1.9               | 17.9, 5.7                 | 1.00 (0.49, 2.02)             | 1.0000  | 6.0, 1.6                               | 17.5, 4.9                 | 0.97 (0.49, 1.92)             | 0.9270  |
| <b>Additional PCV13 IPD</b> |                        |                           |                               |         |                                        |                           |                               |         |
| 65-74                       | 3.3, 4.4               | 9.8, 13.1                 | 0.99 (0.65, 1.52)             | 0.9686  | 3.3, 4.1                               | 10.0, 12.4                | 1.00 (0.66, 1.49)             | 0.9836  |
| 75-84                       | 4.8, 6.3               | 14.4, 18.8                | 1.00 (0.66, 1.52)             | 1.0000  | 4.7, 6.0                               | 13.9, 17.9                | 0.99 (0.67, 1.45)             | 0.9406  |
| ≥85                         | 10.7, 10.6             | 31.9, 31.9                | 0.99 (0.62, 1.59)             | 0.9769  | 10.6, 10.4                             | 30.6, 31.1                | 0.97 (0.62, 1.51)             | 0.8774  |
| <b>Unique PPV23 IPD</b>     |                        |                           |                               |         |                                        |                           |                               |         |
| 65-74                       | 1.6, 3.8               | 4.7, 11.4                 | 0.98 (0.63, 1.52)             | 0.9173  | 1.6, 3.8                               | 4.9, 11.4                 | 0.99 (0.65, 1.51)             | 0.9570  |
| 75-84                       | 2.9, 5.2               | 8.7, 15.5                 | 1.00 (0.63, 1.60)             | 1.0000  | 2.9, 5.0                               | 8.7, 15.0                 | 0.99 (0.63, 1.54)             | 0.9576  |

|                                 |                  |                   |                         |         |                 |                 |                         |        |
|---------------------------------|------------------|-------------------|-------------------------|---------|-----------------|-----------------|-------------------------|--------|
| ≥85                             | 6.3,<br>9.9      | 18.4,<br>29.7     | 0.98<br>(0.58,<br>1.67) | 0.9504  | 6.4,<br>9.4     | 18.8,<br>28.3   | 0.98<br>(0.60,<br>1.60) | 0.9462 |
| <b>Non-vaccine serotype IPD</b> |                  |                   |                         |         |                 |                 |                         |        |
| 65-74                           | 1.6,<br>3.8      | 4.7,<br>11.5      | 1.00<br>(0.59,<br>1.67) | 0.9854  | 1.6,<br>3.8     | 4.7,<br>11.5    | 1.00<br>(0.60,<br>1.66) | 1.0000 |
| 75-84                           | 3.2,<br>6.9      | 9.6,<br>20.8      | 1.00<br>(0.66,<br>1.53) | 1.0000  | 3.2,<br>7.1     | 9.6,<br>21.4    | 1.00<br>(0.66,<br>1.51) | 1.0000 |
| ≥85                             | 4.7,<br>11.9     | 13.7,<br>35.7     | 0.98<br>(0.56,<br>1.70) | 0.9301  | 4.4,<br>11.6    | 12.7,<br>34.9   | 0.96<br>(0.56,<br>1.63) | 0.8656 |
| <b>All-cause pneumonia</b>      |                  |                   |                         |         |                 |                 |                         |        |
| 65-74                           | 223.7,<br>269.3  | 461.1,<br>406.1   | 1.37<br>(1.27,<br>1.47) | <0.0001 | 220.4,<br>232.3 | 220.2,<br>232.3 | 1.00<br>(0.93,<br>1.08) | 0.9806 |
| 75-84                           | 484.1,<br>603.7  | 1221.8,<br>1068.8 | 1.43<br>(1.32,<br>1.54) | <0.0001 | 470.5,<br>428.3 | 411.2,<br>428.3 | 0.87<br>(0.80,<br>0.95) | 0.0019 |
| ≥85                             | 865.7,<br>1262.7 | 2517.2,<br>2667.8 | 1.38<br>(1.23,<br>1.54) | <0.0001 | 793.7,<br>773.2 | 694.5,<br>773.2 | 0.87<br>(0.78,<br>0.98) | 0.0166 |

\* Invasive pneumococcal disease (IPD) identified from public health laboratory data, and pneumonia identified from CIHI hospital admission discharge abstract database (DAD)

Supplemental Table S5: Indirect impact of PCV13 on invasive pneumococcal disease and hospitalized pneumonia in older adults by age group in British Columbia, 2005–2018

| Age group, years            | Fracture control       |                           |                               |         | Skin and soft tissue infection control |                           |                               |         |
|-----------------------------|------------------------|---------------------------|-------------------------------|---------|----------------------------------------|---------------------------|-------------------------------|---------|
|                             | Incidence per 100,000  |                           | Ratio of risk ratios (95% CI) | P-value | Incidence per 100,000                  |                           | Ratio of risk ratios (95% CI) | P-value |
|                             | Case, pre-PCV13, PCV13 | Control, pre-PCV13, PCV13 |                               |         | Case, pre-PCV13, PCV13                 | Control, pre-PCV13, PCV13 |                               |         |
| <b>All IPD</b>              |                        |                           |                               |         |                                        |                           |                               |         |
| 65-74                       | 12.5, 13.6             | 37.3, 41.0                | 1.00 (0.77, 1.28)             | 0.9795  | 12.5, 13.7                             | 37.5, 40.9                | 1.00 (0.78, 1.29)             | 0.9991  |
| 75-84                       | 14.8, 18.1             | 44.2, 54.2                | 0.99 (0.79, 1.26)             | 0.9533  | 14.7, 18.1                             | 44.0, 54.4                | 1.00 (0.79, 1.26)             | 0.9766  |
| ≥85                         | 29.1, 29.4             | 87.8, 88.1                | 1.01 (0.76, 1.33)             | 0.9693  | 29.4, 29.4                             | 87.1, 88.1                | 0.99 (0.75, 1.31)             | 0.9384  |
| <b>PCV7 IPD</b>             |                        |                           |                               |         |                                        |                           |                               |         |
| 65-74                       | 2.9, 1.3               | 8.5, 3.9                  | 0.97 (0.58, 1.64)             | 0.9197  | 2.9, 1.3                               | 8.6, 3.9                  | 1.00 (0.59, 1.69)             | 1.00    |
| 75-84                       | 3.5, 1.4               | 10.6, 4.1                 | 1.00 (0.55, 1.82)             | 1.00    | 3.5, 1.4                               | 10.6, 4.1                 | 1.00 (0.55, 1.83)             | 1.00    |
| ≥85                         | 6.2, 1.5               | 18.7, 4.6                 | 1.00 (0.50, 2.01)             | 1.00    | 6.2, 1.5                               | 18.5, 4.6                 | 0.99 (0.49, 1.98)             | 0.971   |
| <b>Additional PCV13 IPD</b> |                        |                           |                               |         |                                        |                           |                               |         |
| 65-74                       | 4.1, 3.8               | 12.4, 11.3                | 1.00 (0.69, 1.45)             | 1.00    | 4.1, 3.8                               | 12.4, 11.3                | 1.00 (0.69, 1.45)             | 1.00    |
| 75-84                       | 4.7, 4.6               | 14.0, 13.8                | 1.00 (0.66, 1.51)             | 1.00    | 4.7, 4.6                               | 13.8, 13.9                | 0.98 (0.65, 1.48)             | 0.924   |
| ≥85                         | 8.9, 7.3               | 26.6, 21.8                | 1.00 (0.59, 1.69)             | 1.00    | 8.9, 7.3                               | 26.6, 21.8                | 1.00 (0.59, 1.69)             | 1.00    |
| <b>Unique PPV23 IPD</b>     |                        |                           |                               |         |                                        |                           |                               |         |
| 65-74                       | 3.5, 4.9               | 10.6, 14.7                | 1.00 (0.69, 1.45)             | 1.00    | 3.5, 4.9                               | 10.6, 14.7                | 1.00 (0.69, 1.45)             | 1.00    |
| 75-84                       | 4.3, 6.5               | 12.9, 19.5                | 1.00 (0.66, 1.52)             | 1.00    | 4.3, 6.5                               | 12.9, 19.5                | 1.00 (0.66, 1.52)             | 1.00    |

|                                 |                 |                   |                         |        |                 |                   |                         |        |
|---------------------------------|-----------------|-------------------|-------------------------|--------|-----------------|-------------------|-------------------------|--------|
| ≥85                             | 7.4,<br>8.2     | 22.3,<br>24.5     | 1.00<br>(0.59,<br>1.68) | 1.00   | 7.4,<br>8.2     | 22.0,<br>24.5     | 0.99<br>(0.59,<br>1.66) | 0.9674 |
| <b>Non-vaccine serotype IPD</b> |                 |                   |                         |        |                 |                   |                         |        |
| 65-74                           | 1.7,<br>3.7     | 5.0<br>11.0       | 1.00<br>(0.61,<br>1.63) | 1.00   | 1.7,<br>3.7     | 5.0,<br>11.0      | 1.00<br>(0.62,<br>1.62) | 1.00   |
| 75-84                           | 2.1,<br>5.7     | 6.4,<br>17.1      | 1.00<br>(0.54,<br>1.85) | 1.00   | 2.1,<br>5.7     | 6.4,<br>17.1      | 1.00<br>(0.54,<br>1.84) | 1.00   |
| ≥85                             | 5.2,<br>12.4    | 15.5,<br>37.2     | 1.00<br>(0.59,<br>1.70) | 1.00   | 5.2,<br>12.4    | 15.5,<br>37.2     | 1.00<br>(0.59,<br>1.70) | 1.00   |
| <b>All-cause pneumonia</b>      |                 |                   |                         |        |                 |                   |                         |        |
| 65-74                           | 189.3,<br>183.0 | 568.2,<br>549.0   | 1.00<br>(0.92,<br>1.09) | 0.998  | 189.0,<br>183.3 | 566.6,<br>549.6   | 1.00<br>(0.92,<br>1.09) | 0.9919 |
| 75-84                           | 397.6,<br>381.0 | 1191.7,<br>1142.9 | 1.00<br>(0.91,<br>1.09) | 0.9853 | 396.4,<br>381.2 | 1190.0,<br>1144.9 | 1.00<br>(0.92,<br>1.09) | 0.992  |
| ≥85                             | 721.1,<br>731.9 | 2167.2,<br>2194.6 | 1.00<br>(0.90,<br>1.12) | 0.9664 | 721.3,<br>732.1 | 2150.7,<br>2195.0 | 0.99<br>(0.89,<br>1.11) | 0.9217 |

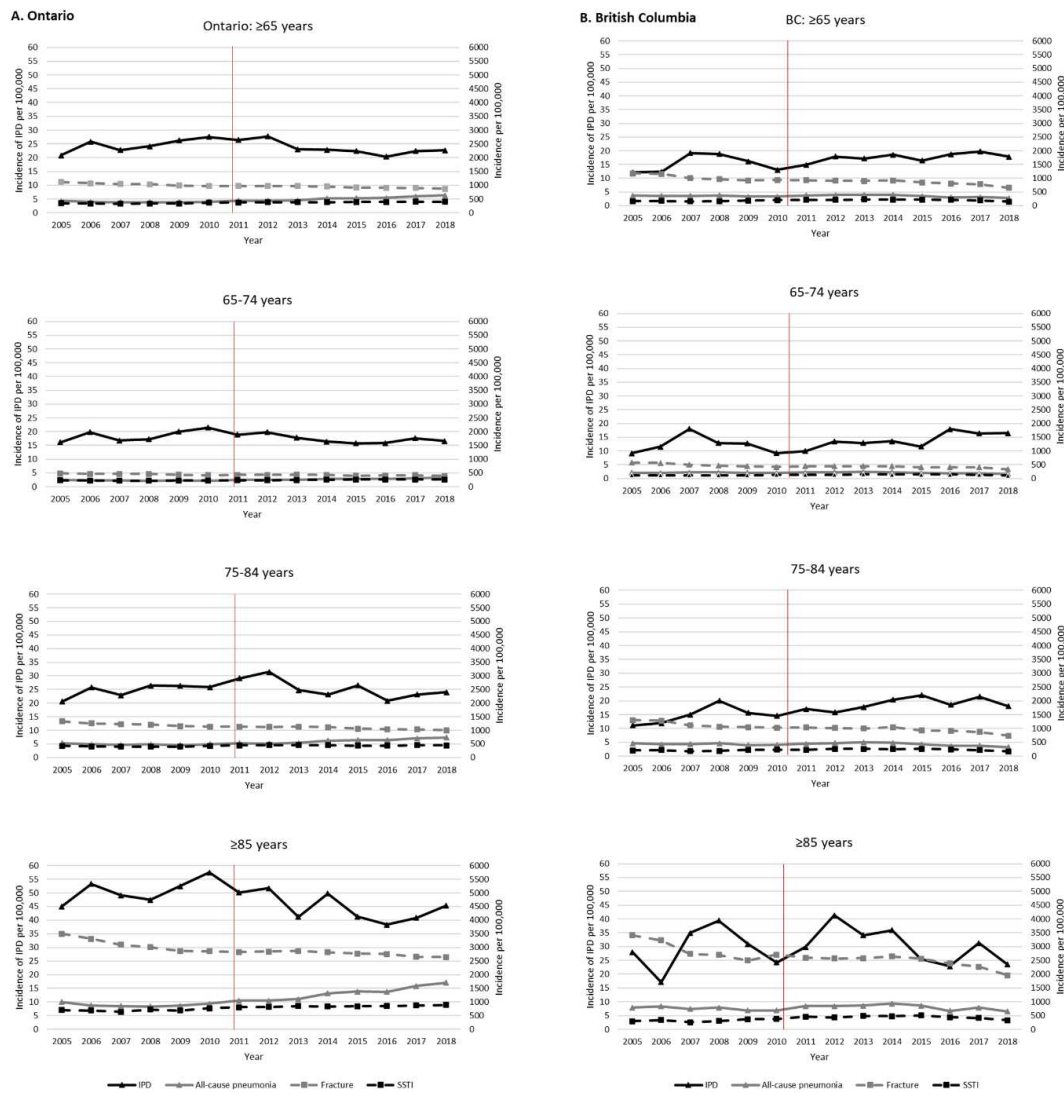

Supplemental Figure 1: Annual incidence of invasive pneumococcal disease, IPD (left-hand axes), all-cause pneumonia (right-hand axes), fracture (right-hand axes), and skin and soft tissue infection, SSTI (right-hand axes),  $\geq 65$  years and for each age group in Ontario (A) and British Columbia (B), 2005–2018. Red vertical line indicates the introduction of PCV13 in publicly funded childhood vaccination program in 2010.

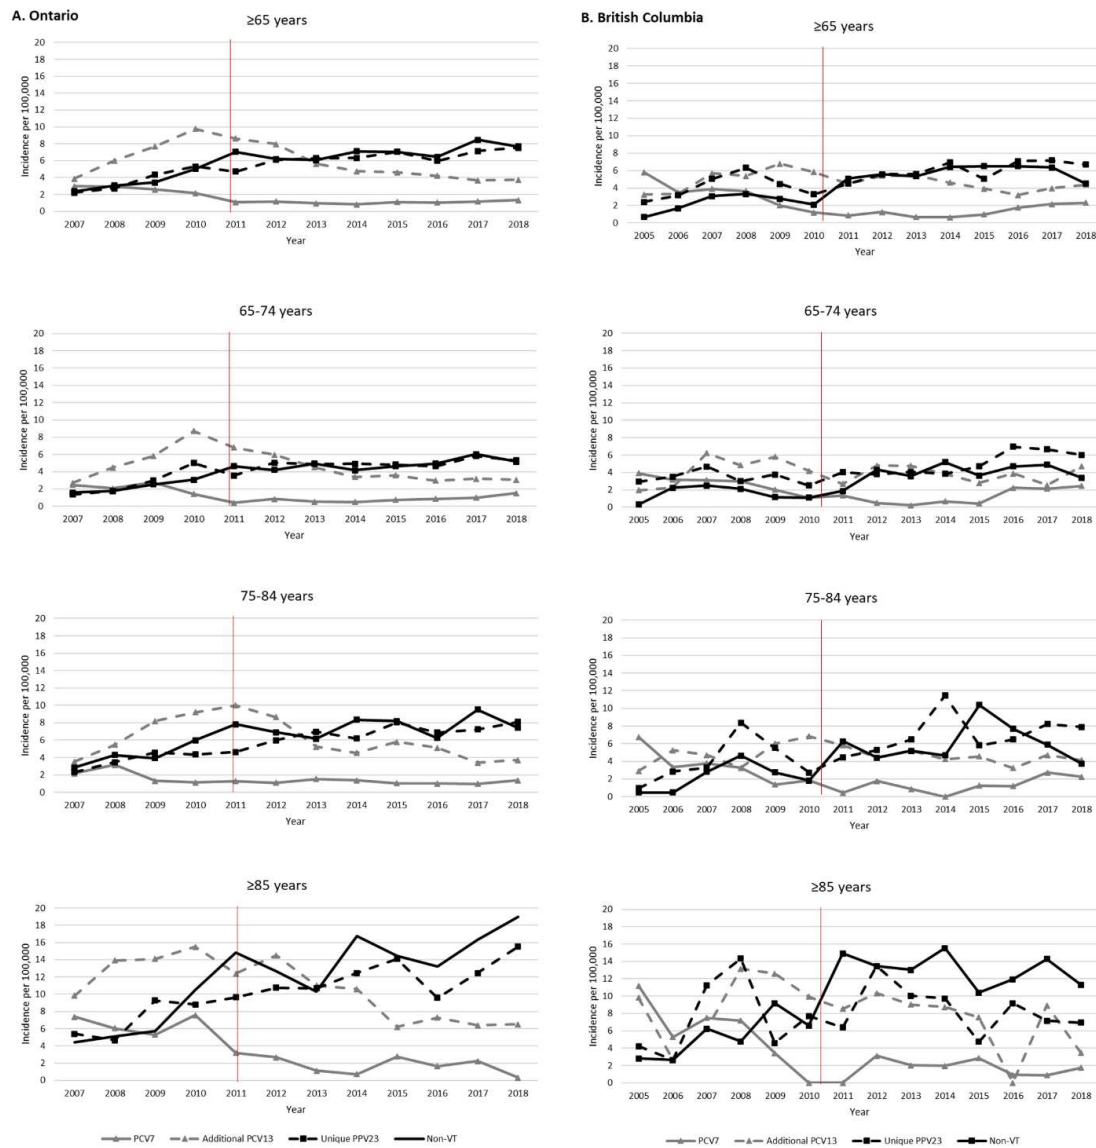

Supplemental Figure 2: Annual incidence of pneumococcal conjugate vaccine (PCV) serotype-specific invasive pneumococcal disease,  $\geq 65$  years and for each age group in Ontario (A) and British Columbia (B), 2005–2018. Red vertical line indicates the introduction of PCV13 in publicly funded childhood vaccination program in 2010.
